# Supplementary material for: The Embodied Self in Parkinson's Disease: Feasibility of a Single Tango Intervention for Assessing Changes in Psychological Health Outcomes and Aesthetic Experience
Source: PubMed Central journal article supplement (PMC4935674; doi:10.3389/fnins.2016.00287), 2016-07-07
Supplement: Presentation2.pdf [file Presentation2.pdf]

## Appendix B: The Questionnaire (Primary Outcome Measures)

### 1. Credibility Expectancy Questionnaire (German version: Raeke, 2013; English version: Ametrano, 2011)

Wir bitten Sie im Folgenden anzukreuzen, wie sehr Sie jetzt gerade im Moment glauben, dass die Behandlung/Therapie Ihre Symptome reduzieren wird. Meistens gibt es zwei Aspekte: (1) Was man *glaubt*, was passieren wird und (2) was man *fühlt*, was passieren wird. Manchmal sind diese Aspekte sehr ähnlich, manchmal auch verschieden. Bitte beantworten Sie nun die folgenden Fragen. In Teil 1 beantworten Sie bitte, was Sie denken und in Teil 2, wie Sie fühlen.

#### Teil 1

1. Wie logisch finden Sie die Therapie zum jetzigen Zeitpunkt?

1 2 3 4 5 6 7 8 9

gar nicht logisch

etwas logisch

sehr logisch

2. Wie sehr denken Sie, dass die Therapie hilfreich ist, um Ihre Symptome zu reduzieren?

1 2 3 4 5 6 7 8 9

gar nicht hilfreich

etwas hilfreich

sehr hilfreich

3. Wie zuversichtlich wären Sie, diese Therapie einem Freund zu empfehlen, der ähnliche Probleme hat?

1 2 3 4 5 6 7 8 9

gar nicht zuversichtlich

etwas zuversichtlich

sehr zuversichtlich

4. Was denken Sie, um wieviel sich Ihre Symptome am Ende der Therapieeinheit verbessert haben werden?

0% 10% 20% 30% 40% 50% 60% 70% 80% 90% 100%

#### Teil 2

Für diesen zweiten Teil schließen Sie bitte kurz die Augen und spüren Sie in sich hinein, was Sie über die Therapie und deren möglichen Erfolg *fühlen*.

1. Wie sehr fühlen Sie, dass die Therapie hilfreich ist, um Ihre Symptome zu reduzieren?

1 2 3 4 5 6 7 8 9

gar nicht hilfreich

etwas hilfreich

sehr hilfreich

2. Was fühlen Sie, um wieviel sich Ihre Symptome am Ende der Therapieeinheit verbessert haben werden?

0% 10% 20% 30% 40% 50% 60% 70% 80% 90% 100%

## 2. Body Self-Efficacy-Scale (BSE; Koch, 2012; English version Fuchs & Koch, 2014)

Bitte geben Sie spontan die für Sie zutreffende Antwort an.

Hierbei bedeutet:

0

5

Trifft nicht zu

Trifft genau zu

|                                                                |   |   |   |   |   |   |
|----------------------------------------------------------------|---|---|---|---|---|---|
| 1. Ich kann mich gut bewegen.                                  | 0 | 1 | 2 | 3 | 4 | 5 |
| 2. Meine Bewegungen sind schön.                                | 0 | 1 | 2 | 3 | 4 | 5 |
| 3. Mein Körper ist flexibel (beweglich).                       | 0 | 1 | 2 | 3 | 4 | 5 |
| 4. Ich habe viele körperliche Mängel.                          | 0 | 1 | 2 | 3 | 4 | 5 |
| 5. Mein Körper ist leblos und dumpf.                           | 0 | 1 | 2 | 3 | 4 | 5 |
| 6. Ich kann leicht über ein Hindernis mittlerer Höhe springen. | 0 | 1 | 2 | 3 | 4 | 5 |
| 7. Mein Körper fühlt sich an wie „in Stücken“.                 | 0 | 1 | 2 | 3 | 4 | 5 |
| 8. Mein Körper fühlt sich oft an, als gehöre er nicht zu mir.  | 0 | 1 | 2 | 3 | 4 | 5 |
| 9. Ich kann mich elegant bewegen.                              | 0 | 1 | 2 | 3 | 4 | 5 |
| 10. Ich kann mich in Bewegung ausdrücken.                      | 0 | 1 | 2 | 3 | 4 | 5 |

## 3. Heidelberg State Inventory (HSI-24 unipolar version; former bipolar version by Koch, Morlinghaus & Fuchs, 2007)

| I momentarily feel... |                     | Does not apply at all    | Does not apply           | Does rather not apply    | Does rather apply        | Does apply               |
|-----------------------|---------------------|--------------------------|--------------------------|--------------------------|--------------------------|--------------------------|
| TE1                   | Relaxed             | <input type="checkbox"/> | <input type="checkbox"/> | <input type="checkbox"/> | <input type="checkbox"/> | <input type="checkbox"/> |
| PA2                   | In a good mood      | <input type="checkbox"/> | <input type="checkbox"/> | <input type="checkbox"/> | <input type="checkbox"/> | <input type="checkbox"/> |
| AN3                   | Without worries     | <input type="checkbox"/> | <input type="checkbox"/> | <input type="checkbox"/> | <input type="checkbox"/> | <input type="checkbox"/> |
| TE4                   | Indulgent           | <input type="checkbox"/> | <input type="checkbox"/> | <input type="checkbox"/> | <input type="checkbox"/> | <input type="checkbox"/> |
| TE5                   | Tense               | <input type="checkbox"/> | <input type="checkbox"/> | <input type="checkbox"/> | <input type="checkbox"/> | <input type="checkbox"/> |
| PA6                   | In a bad mood       | <input type="checkbox"/> | <input type="checkbox"/> | <input type="checkbox"/> | <input type="checkbox"/> | <input type="checkbox"/> |
| DA7                   | Depressed           | <input type="checkbox"/> | <input type="checkbox"/> | <input type="checkbox"/> | <input type="checkbox"/> | <input type="checkbox"/> |
| AN8                   | Anxious             | <input type="checkbox"/> | <input type="checkbox"/> | <input type="checkbox"/> | <input type="checkbox"/> | <input type="checkbox"/> |
| DA9                   | Empty, without life | <input type="checkbox"/> | <input type="checkbox"/> | <input type="checkbox"/> | <input type="checkbox"/> | <input type="checkbox"/> |

|      |                                    |                          |                          |                          |                          |                          |
|------|------------------------------------|--------------------------|--------------------------|--------------------------|--------------------------|--------------------------|
| CO10 | Ready to deal with the world       | <input type="checkbox"/> | <input type="checkbox"/> | <input type="checkbox"/> | <input type="checkbox"/> | <input type="checkbox"/> |
| VII1 | Full of energy                     | <input type="checkbox"/> | <input type="checkbox"/> | <input type="checkbox"/> | <input type="checkbox"/> | <input type="checkbox"/> |
| CO12 | Full of resources / in control     | <input type="checkbox"/> | <input type="checkbox"/> | <input type="checkbox"/> | <input type="checkbox"/> | <input type="checkbox"/> |
| PA13 | Positive                           | <input type="checkbox"/> | <input type="checkbox"/> | <input type="checkbox"/> | <input type="checkbox"/> | <input type="checkbox"/> |
| VII4 | Strong                             | <input type="checkbox"/> | <input type="checkbox"/> | <input type="checkbox"/> | <input type="checkbox"/> | <input type="checkbox"/> |
| TE15 | Fighting                           | <input type="checkbox"/> | <input type="checkbox"/> | <input type="checkbox"/> | <input type="checkbox"/> | <input type="checkbox"/> |
| PA16 | Negative                           | <input type="checkbox"/> | <input type="checkbox"/> | <input type="checkbox"/> | <input type="checkbox"/> | <input type="checkbox"/> |
| AN17 | Full of worries                    | <input type="checkbox"/> | <input type="checkbox"/> | <input type="checkbox"/> | <input type="checkbox"/> | <input type="checkbox"/> |
| CO18 | Not ready to deal with the world   | <input type="checkbox"/> | <input type="checkbox"/> | <input type="checkbox"/> | <input type="checkbox"/> | <input type="checkbox"/> |
| VII9 | Without energy                     | <input type="checkbox"/> | <input type="checkbox"/> | <input type="checkbox"/> | <input type="checkbox"/> | <input type="checkbox"/> |
| CO20 | Without resources / not in control | <input type="checkbox"/> | <input type="checkbox"/> | <input type="checkbox"/> | <input type="checkbox"/> | <input type="checkbox"/> |
| VI21 | Without strength                   | <input type="checkbox"/> | <input type="checkbox"/> | <input type="checkbox"/> | <input type="checkbox"/> | <input type="checkbox"/> |
| DA22 | Not depressed                      | <input type="checkbox"/> | <input type="checkbox"/> | <input type="checkbox"/> | <input type="checkbox"/> | <input type="checkbox"/> |
| DA23 | Full of life                       | <input type="checkbox"/> | <input type="checkbox"/> | <input type="checkbox"/> | <input type="checkbox"/> | <input type="checkbox"/> |
| AN24 | Not anxious                        | <input type="checkbox"/> | <input type="checkbox"/> | <input type="checkbox"/> | <input type="checkbox"/> | <input type="checkbox"/> |

Note. The HSI-24 has six dimensions: TE = Tension (e.g., fighting – indulgent), PA = Positive Affect (e.g., positive – negative), AN = Anxiety (e.g., anxious – not anxious), DA = Depressed Affect (e.g., depressed – not depressed), CO = Coping (e.g., full of resources – without resources\*), and VI = Vitality (e.g., full of energy – without energy). \*the term “resources” did not work well in the German version, most persons needed an explanation (as an alternative we put “in control - not in control” here for future uses); the questionnaire dimensions were developed from theory and empirical findings in dance movement therapy (Goodill, 2006); factor analyses show an underlying general factor (well-being or positive vs. negative affect); internal consistencies have yielded *Cronbach’s Alphas* between .68 and .97.

**Appendix C: Scale for Therapeutic Factors of Arts Therapies in PD** (Secondary Outcome Measure; Koch & Mergheim, 2015)

Dear participant,

Welcome! Please fill in the questionnaire as spontaneously and completely as possible and mark each row with a cross, with “1” signifying „not at all“ and “10” signifying „very much“.

**When you think back to the last hour...**

1. How happy have you been?

1    2    3    4    5    6    7    8    9    10

2. How much beauty did you experience?

1    2    3    4    5    6    7    8    9    10

3. How much pleasure/joy did you experience?

1    2    3    4    5    6    7    8    9    10

4. How well could you express your feelings?

1    2    3    4    5    6    7    8    9    10

5. How fluently could you verbally express yourself?

1    2    3    4    5    6    7    8    9    10

6. How fluent were your movements?

1    2    3    4    5    6    7    8    9    10

7. How close was your experienced connection between body and mind?

1    2    3    4    5    6    7    8    9    10

8. How strongly did you experience the unison with your partner?

1    2    3    4    5    6    7    8    9    10
